# Supplementary material for: Citrus × Clementina Hort. Juice Enriched with Its By-Products (Peels and Leaves): Chemical Composition, In Vitro Bioactivity, and Impact of Processing
Source: PubMed Central journal article supplement (PMC7222210; doi:10.3390/antiox9040298), 2020-04-03
Supplement: antioxidants-09-00298-s001.pdf [file antioxidants-09-00298-s001.pdf]

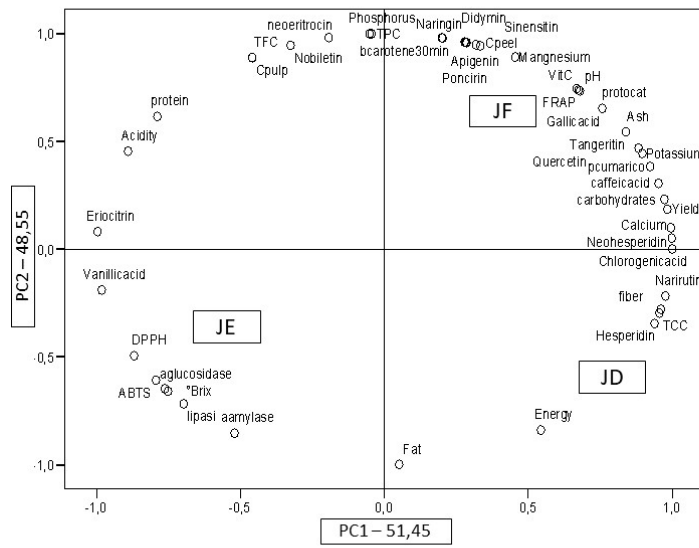

Figure S1. PCA analysis of *C. x clementina* juice

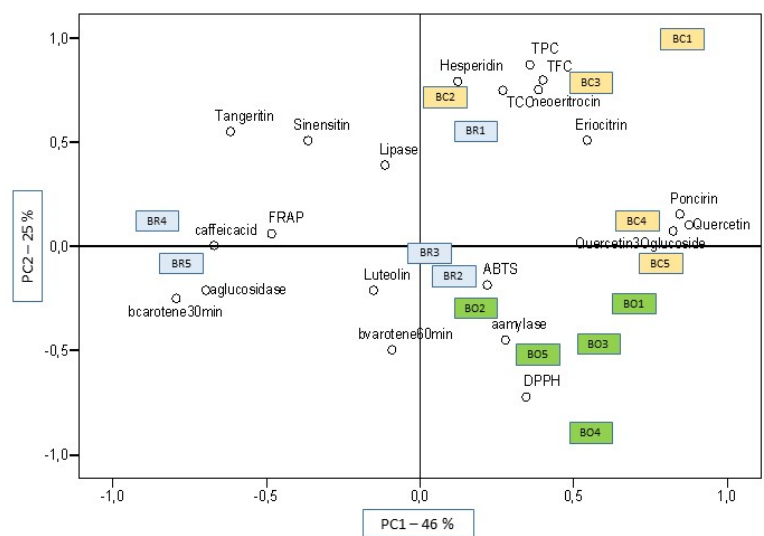

**Figure S2.** PCA analysis of *C. x clementina* peels extracts

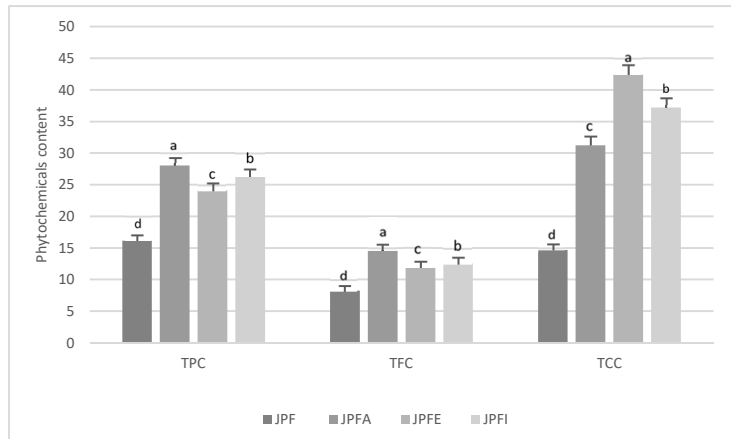

Data represent means  $\pm$  SD (standard deviation) ( $n = 3$ ). Differences were evaluated by one-way analysis of variance (ANOVA) test completed with a multicomparison Tukey's test.  $**p < 0.05$ . Means in the same column with different small letters differ significantly ( $p < 0.05$ ).

**Figure S3.** Phytochemicals content in pasteurized juices

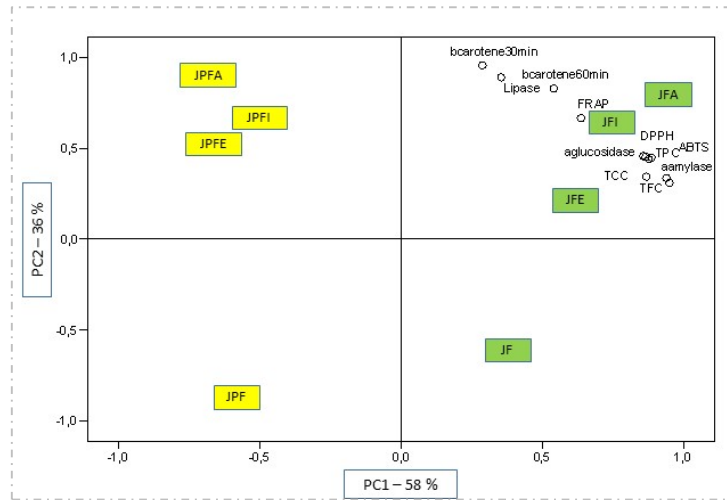

Figure S4. PCA enriched juice samples

**Table S1.** Calibration curves, detection limits (LOD), quantification limits (LOQ) of analytical method for determination of phenolic compounds in *Citrus × clementina* samples

| STANDARD<br>COMPOUNDS   | Specificity            |        | LOD <sup>a</sup> | LOQ <sup>b</sup> | Precision<br>(RDS %) <sup>d</sup> |
|-------------------------|------------------------|--------|------------------|------------------|-----------------------------------|
|                         | Equation               | $r^2$  | mg/L             | mg/L             | Repeatability                     |
| Apigenin                | $y = 13.331x - 54.145$ | 0.9982 | 0.001            | 0.012            | 0.03                              |
| Caffeic acid            | $y = 235.28x + 9.0586$ | 0.9994 | 0.003            | 0.010            | 0.06                              |
| Chlorogenic acid        | $y = 125.72x - 4.4446$ | 0.9994 | 0.004            | 0.025            | 0.04                              |
| Didymin                 | $y = 83.401x + 2.1416$ | 0.9999 | 0.003            | 0.018            | 0.02                              |
| Eriocitrin              | $y = 71.885x - 0.2384$ | 0.9999 | 0.001            | 0.024            | 0.08                              |
| Gallic acid             | $y = 39.423x - 14.999$ | 0.9994 | 0.001            | 0.014            | 0.02                              |
| Hesperidin              | $y = 15.013x + 1.1586$ | 0.9998 | 0.001            | 0.012            | 0.02                              |
| Luteolin                | $y = 154.38x + 9.7542$ | 0.9997 | 0.001            | 0.012            | 0.04                              |
| Naringin                | $y = 76.64x + 12.726$  | 0.9993 | 0.002            | 0.027            | 0.05                              |
| Narirutin               | $y = 81.047x + 3.762$  | 0.9993 | 0.003            | 0.014            | 0.05                              |
| Neoeriocitrin           | $y = 79.482x + 5.9704$ | 0.9992 | 0.002            | 0.015            | 0.04                              |
| Neohesperidin           | $y = 143.95x + 0.5859$ | 0.9999 | 0.003            | 0.018            | 0.02                              |
| Nobiletin               | $y = 13.275x + 6.2888$ | 0.9999 | 0.004            | 0.017            | 0.05                              |
| <i>p</i> -Coumaric acid | $y = 173.56x + 7.4967$ | 0.9994 | 0.001            | 0.014            | 0.02                              |
| Poncirin                | $y = 190.94x - 1.3754$ | 0.9999 | 0.002            | 0.022            | 0.01                              |
| Protocatechuic acid     | $y = 144.54x + 4.3734$ | 0.9994 | 0.004            | 0.018            | 0.03                              |
| Quercetin               | $y = 138.33x - 342.07$ | 0.9991 | 0.002            | 0.027            | 0.03                              |
| Quercetin-3-O glucoside | $y = 134.99x - 354.9$  | 0.9989 | 0.002            | 0.018            | 0.04                              |
| Sinensetin              | $y = 107.07x + 16.575$ | 0.9997 | 0.001            | 0.010            | 0.04                              |
| Tangeritin              | $y = 168x + 3.2604$    | 0.9992 | 0.002            | 0.032            | 0.06                              |
| Vanillic acid           | $y = 134.01x + 43.634$ | 0.9996 | 0.001            | 0.014            | 0.02                              |

<sup>a</sup> Defined as the signal height at a signal/noise ratio S/N = 3.

<sup>b</sup> Defined as the signal height at a signal/noise ratio S/N = 10.

<sup>c</sup> Precision was expressed as the rsd % of N=3 determination

**Table S2.** Calibration curves, detection limits (LOD), quantification limits (LOQ) of analytical method for determination of coumarins in *Citrus × clementina* samples

| STANDARD<br>COMPOUNDS | Specificity            |        | LOD <sup>a</sup> | LOQ <sup>b</sup> | Precision<br>(RDS %) <sup>d</sup> |
|-----------------------|------------------------|--------|------------------|------------------|-----------------------------------|
|                       | Equation               | $r^2$  | mg/L             | mg/L             | Repeatability                     |
| Umbelliferone         | $y = 1204.2x + 90.928$ | 0.9946 | 0.001            | 0.003            | 0.02                              |
| Isopimpinellin        | $y = 2657.5x + 987.46$ | 0.9930 | 0.06             | 0.21             | 0.04                              |
| Bergapten             | $y = 1270.1x + 99.83$  | 0.9905 | 0.02             | 0.06             | 0.03                              |

<sup>a</sup> Defined as the signal height at a signal/noise ratio S/N = 3.

<sup>b</sup> Defined as the signal height at a signal/noise ratio S/N = 10.

<sup>c</sup> Precision was expressed as the rsd % of N=3 determination

**Table S3.** Fruit quality characteristics

| Parameters                              | Cetraro (D)                 | Rosarno (E)                 | Corigliano Calabro (F)      |
|-----------------------------------------|-----------------------------|-----------------------------|-----------------------------|
| Fruit weigh (g)                         | 87.19 ± 3.21 <sup>d</sup>   | 109.67 ± 5.91 <sup>c</sup>  | 116.61 ± 9.13 <sup>b</sup>  |
| Equatorial diameter (cm)                | 4.67 ± 0.76 <sup>c</sup>    | 4.83 ± 0.79 <sup>b</sup>    | 4.55 ± 0.74 <sup>d</sup>    |
| Longitudinal diameter(cm)               | 4.54 ± 0.81 <sup>c</sup>    | 6.23 ± 0.85 <sup>b</sup>    | 6.72 ± 0.98 <sup>a</sup>    |
| Fruit firmness (g/0.5 cm <sup>2</sup> ) | 410.19 ± 12.99 <sup>d</sup> | 412.28 ± 14.56 <sup>c</sup> | 420.92 ± 14.21 <sup>b</sup> |
| Peels thickness(mm)                     | 11.12 ± 0.28 <sup>d</sup>   | 11.22 ± 0.27 <sup>c</sup>   | 12.31 ± 0.40 <sup>a</sup>   |
| Total seeds per fruit                   | 4.25 ± 0.24 <sup>c</sup>    | 5.54 ± 0.32 <sup>b</sup>    | 4.14 ± 0.24 <sup>c</sup>    |

Data are expressed as mean ± standard deviation (SD) (n= 3). Differences were evaluated by one-way analysis of variance (ANOVA) test completed with a multicomparison Tukey's test. \*\*  $p < 0.05$ . Means in the same column with different small letters differ significantly ( $p < 0.05$ ).

**Table S4.** Positive *Pearson's* correlation between phenolic compounds content in investigated juice and activity

|                           | DPPH test | ABTS test | $\beta$ -carotene<br>bleaching test<br>t 30 min | $\beta$ -carotene<br>bleaching test<br>t 60 min | FRAP test |
|---------------------------|-----------|-----------|-------------------------------------------------|-------------------------------------------------|-----------|
| Total phenols content     | 0.21      | 0.55      |                                                 |                                                 |           |
| Total flavonoids content  |           |           | 0.72                                            | 0.62                                            | 0.67      |
| Total carotenoids content | 0.57      | 0.45      |                                                 |                                                 |           |
| Ascorbic acid             |           |           | 0.48                                            | 0.42                                            | 0.69      |
| Caffeic acid              |           |           | 0.51                                            | 0.49                                            | 0.81      |
| Protocatechuic acid       |           |           | 0.49                                            | 0.44                                            | 0.80      |
| <i>p</i> -Coumaric acid   |           |           | 0.75                                            | 0.82                                            | 0.73      |
| Chlorogenic acid          | 0.54      | 0.15      |                                                 |                                                 |           |
| Vanillic acid             | 0.55      | 0.41      |                                                 |                                                 |           |
| Eriocitrin                |           |           | 0.78                                            | 0.79                                            | 0.47      |
| Gallic acid               | 0.50      | 0.09      | 0.08                                            | 0.13                                            | 0.26      |
| Apigenin                  |           |           | 0.31                                            | 0.27                                            | 0.33      |
| Didymin                   |           | 0.13      | 0.20                                            | 0.13                                            | 0.31      |
| Quercetin                 |           |           | 0.39                                            | 0.46                                            | 0.42      |
| Hesperidin                |           |           |                                                 |                                                 | 0.34      |
| Neohesperidin             | 0.21      |           | 0.18                                            | 0.32                                            | 0.20      |
| Neoritrocin               | 0.18      | 0.24      | 0.15                                            | 0.04                                            | 0.26      |
| Naringin                  |           |           | 0.87                                            | 0.86                                            | 0.73      |
| Narirutin                 | 0.87      |           |                                                 | 0.86                                            | 0.73      |
| Poncirin                  |           |           | 0.66                                            | 0.60                                            | 0.67      |
| Sinensetin                |           |           |                                                 |                                                 | 0.56      |
| Tangeritin                |           |           | 0.62                                            | 0.64                                            | 0.79      |



**Table S5.** Enriched juice quality parameters

| Parameters | <sup>o</sup> Brix         | pH                        | Acidity (g/100mL)           | Croma value (C*)            | Total phenols content <sup>1</sup> | Total flavonoids content <sup>2</sup> | Total carotenoids content <sup>3</sup> |
|------------|---------------------------|---------------------------|-----------------------------|-----------------------------|------------------------------------|---------------------------------------|----------------------------------------|
| JF         | 10.24 ± 1.03 <sup>a</sup> | 3.72 ± 0.07 <sup>a</sup>  | 0.70 ± 0.02 <sup>bcd</sup>  | 34.04 ± 2.02 <sup>b</sup>   | 31.12 ± 1.13 <sup>l</sup>          | 18.23 ± 0.76 <sup>o</sup>             | 54.65 ± 1.44 <sup>o</sup>              |
| JFA        | 10.23 ± 1.14 <sup>a</sup> | 3.62 ± 0.04 <sup>f</sup>  | 0.71 ± 0.03 <sup>a</sup>    | 33.71 ± 2.00 <sup>f</sup>   | 41.01 ± 1.04 <sup>a</sup>          | 28.44 ± 1.04 <sup>a</sup>             | 61.56 ± 1.76 <sup>e</sup>              |
| JFB        | 10.22 ± 1.31 <sup>a</sup> | 3.64 ± 0.06 <sup>f</sup>  | 0.71 ± 0.02 <sup>ab</sup>   | 33.82 ± 2.03 <sup>ef</sup>  | 40.26 ± 1.16 <sup>b</sup>          | 26.11 ± 1.15 <sup>c</sup>             | 59.78 ± 1.43 <sup>f</sup>              |
| JFC        | 10.22 ± 1.02 <sup>a</sup> | 3.68 ± 0.05 <sup>c</sup>  | 0.70 ± 0.02 <sup>abc</sup>  | 33.94 ± 2.02 <sup>cde</sup> | 38.55 ± 1.12 <sup>cd</sup>         | 24.01 ± 1.12 <sup>f</sup>             | 57.89 ± 1.17 <sup>i</sup>              |
| JFD        | 10.22 ± 1.04 <sup>a</sup> | 3.7 ± 0.06 <sup>ab</sup>  | 0.71 ± 0.04 <sup>abcd</sup> | 34.02 ± 2.10 <sup>b</sup>   | 34.34 ± 1.12 <sup>e</sup>          | 20.55 ± 1.01 <sup>l</sup>             | 56.76 ± 1.26 <sup>m</sup>              |
| JFE        | 10.25 ± 1.12 <sup>a</sup> | 3.65 ± 0.07 <sup>ed</sup> | 0.71 ± 0.02 <sup>abcd</sup> | 33.94 ± 2.09 <sup>cde</sup> | 39.10 ± 1.07 <sup>c</sup>          | 24.34 ± 1.12 <sup>e</sup>             | 62.45 ± 2.23 <sup>b</sup>              |
| JFF        | 10.24 ± 1.03 <sup>a</sup> | 3.67 ± 0.05 <sup>cd</sup> | 0.69 ± 0.03 <sup>d</sup>    | 34.01 ± 2.11 <sup>bc</sup>  | 38.01 ± 1.43 <sup>d</sup>          | 22.32 ± 1.10 <sup>e</sup>             | 61.98 ± 1.99 <sup>d</sup>              |
| JFG        | 10.23 ± 1.13 <sup>a</sup> | 3.68 ± 0.07 <sup>bc</sup> | 0.69 ± 0.03 <sup>cd</sup>   | 34.04 ± 2.02 <sup>b</sup>   | 37.43 ± 1.12 <sup>e</sup>          | 20.43 ± 1.28 <sup>l</sup>             | 58.89 ± 1.11 <sup>g</sup>              |
| JFH        | 10.22 ± 1.20 <sup>a</sup> | 3.71 ± 0.03 <sup>a</sup>  | 0.71 ± 0.04 <sup>abcd</sup> | 34.08 ± 2.07 <sup>bc</sup>  | 33.21 ± 1.25 <sup>h</sup>          | 19.78 ± 0.87 <sup>m</sup>             | 56.55 ± 1.56 <sup>n</sup>              |
| JFI        | 10.24 ± 1.03 <sup>a</sup> | 3.68 ± 0.07 <sup>cd</sup> | 0.69 ± 0.03 <sup>d</sup>    | 33.87 ± 2.04 <sup>e</sup>   | 40.34 ± 1.11 <sup>b</sup>          | 26.53 ± 1.12 <sup>b</sup>             | 62.15 ± 1.43 <sup>c</sup>              |
| JFL        | 10.23 ± 1.03 <sup>a</sup> | 3.69 ± 0.05 <sup>bc</sup> | 0.69 ± 0.03 <sup>bcd</sup>  | 33.91 ± 2.06 <sup>de</sup>  | 39.76 ± 1.12 <sup>b</sup>          | 25.22 ± 1.15 <sup>d</sup>             | 61.89 ± 1.32 <sup>a</sup>              |
| JFM        | 10.22 ± 1.04 <sup>a</sup> | 3.70 ± 0.08 <sup>ab</sup> | 0.70 ± 0.04 <sup>abcd</sup> | 34.97 ± 2.12 <sup>a</sup>   | 35.31 ± 1.21 <sup>f</sup>          | 21.32 ± 1.04 <sup>h</sup>             | 58.23 ± 1.65 <sup>h</sup>              |
| JFN        | 10.22 ± 1.02 <sup>a</sup> | 3.70 ± 0.08 <sup>ab</sup> | 0.71 ± 0.04 <sup>bcd</sup>  | 34.01 ± 2.07 <sup>bc</sup>  | 33.46 ± 1.12 <sup>h</sup>          | 19.34 ± 0.45 <sup>n</sup>             | 57.34 ± 1.12 <sup>l</sup>              |

<sup>1</sup>mg equivalents of chlorogenic acid/100 mL; <sup>2</sup>mg equivalents of quercetin/100 mL; <sup>3</sup>mg equivalents of β-carotene/100 mL. Data represent means ± SD (standard deviation) (n = 3). Differences were evaluated by one-way analysis of variance (ANOVA) test completed with a multicomparison Tukey's test. \*\*p < 0.05. Means in the same column with different small letters differ significantly (p < 0.05).

**Table S6.** Pasteurized enriched juice quality parameters

| Samples | °Brix                      | pH                       | Acidity (g/100mL)         | Croma value (C*)          |
|---------|----------------------------|--------------------------|---------------------------|---------------------------|
| JPF     | 10.11 ± 1.52 <sup>cb</sup> | 3.70 ± 0.53 <sup>a</sup> | 0.75 ± 0.07 <sup>ab</sup> | 30.90 ± 1.91 <sup>a</sup> |
| JPFA    | 10.09 ± 1.51 <sup>c</sup>  | 3.71 ± 0.53 <sup>a</sup> | 0.76 ± 0.08 <sup>a</sup>  | 29.04 ± 1.88 <sup>b</sup> |
| JPFE    | 10.13 ± 1.53 <sup>a</sup>  | 3.69 ± 0.51 <sup>a</sup> | 0.75 ± 0.06 <sup>ab</sup> | 29.51 ± 1.87 <sup>b</sup> |
| JPFI    | 10.11 ± 1.52 <sup>ab</sup> | 3.7 ± 0.52 <sup>a</sup>  | 0.74 ± 0.07 <sup>b</sup>  | 29.16 ± 1.86 <sup>b</sup> |

Data represent means ± SD (standard deviation) ( $n = 3$ ). Differences were evaluated by one-way analysis of variance (ANOVA) test completed with a multicomparison Tukey's test. \*\* $p < 0.05$ . Means in the same column with different small letters differ significantly ( $p < 0.05$ ).

**Table S7.** Results of sensory analysis of clementine pasteurized enriched juice

| Samples | Appearance        | Colour            | Odour             | Aroma             | Sweetness         | Acidity           | Astringency       | Mouthfeel         |
|---------|-------------------|-------------------|-------------------|-------------------|-------------------|-------------------|-------------------|-------------------|
| JF      | 7.59 <sup>c</sup> | 7.94 <sup>b</sup> | 7.87 <sup>a</sup> | 8.10 <sup>a</sup> | 8.01 <sup>a</sup> | 7.76 <sup>a</sup> | 7.93 <sup>a</sup> | 7.89 <sup>a</sup> |
| JFA     | 7.47 <sup>c</sup> | 7.93 <sup>b</sup> | 7.81 <sup>a</sup> | 7.81 <sup>c</sup> | 7.87 <sup>c</sup> | 7.71 <sup>c</sup> | 7.84 <sup>b</sup> | 7.73 <sup>c</sup> |
| JFE     | 8.11 <sup>a</sup> | 8.25 <sup>a</sup> | 8.07 <sup>a</sup> | 7.86 <sup>c</sup> | 7.98 <sup>b</sup> | 7.73 <sup>b</sup> | 7.86 <sup>b</sup> | 7.86 <sup>b</sup> |
| JFI     | 7.61 <sup>b</sup> | 7.96 <sup>b</sup> | 7.86 <sup>a</sup> | 7.91 <sup>b</sup> | 8.00 <sup>a</sup> | 7.74 <sup>b</sup> | 7.85 <sup>b</sup> | 7.85 <sup>b</sup> |

Data represent means  $\pm$  SD (standard deviation) ( $n = 3$ ). Differences were evaluated by one-way analysis of variance (ANOVA) test completed with a multicomparison Tukey's test. \*\* $p < 0.05$ . Means in the same column with different small letters differ significantly ( $p < 0.05$ ).
